# Supplementary material for: Bionic Silk Fibroin Film Induces Morphological Changes and Differentiation of Tendon Stem/Progenitor Cells
Source: Hindawi journal article supplement (doi:10.1155/2020/8865841), 2020-12-01

serrated jaws

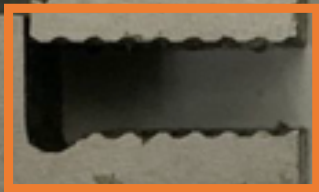

grip

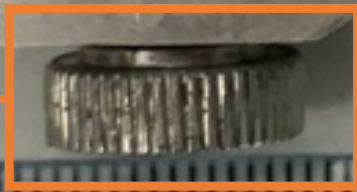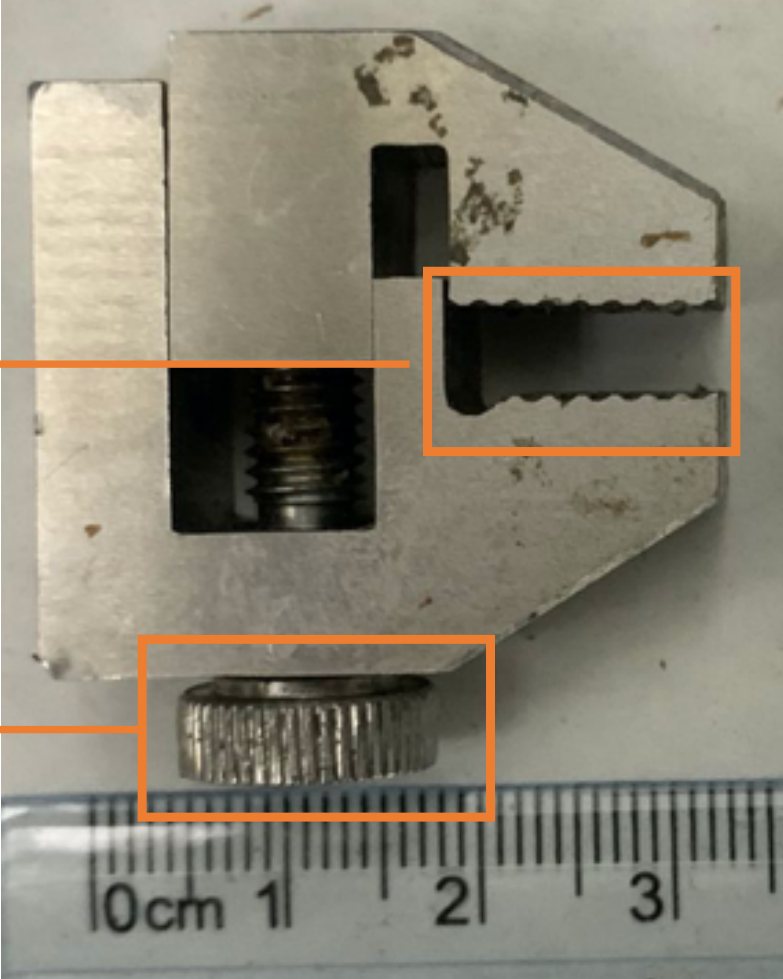

Supplement: f1 [file 8865841.f1.pdf]
